# Supplementary material
Source: PubMed Central journal article supplement (PMC3732124)
Supplement: Supp_Table1.pdf [file Supp_Table1.pdf]

## Supplementary Data

SUPPLEMENTARY TABLE 1. NAB ASSAYS DESCRIBED IN THE LITERATURE

| <i>Stimulation</i>      | <i>Cell line(s)</i> | <i>Neutralizing titer</i> | <i>Gene</i>            | <i>DRP/<math>\mu</math>l serum dilution</i> | <i>ELISA</i> | <i>Heat inact.</i> | <i>Ref.</i>                                                   |
|-------------------------|---------------------|---------------------------|------------------------|---------------------------------------------|--------------|--------------------|---------------------------------------------------------------|
| wtAd                    | HuH7                | 1/20                      | lacZ                   | $\sim 4 \times 10^7$                        | no           | yes                | (Calcedo <i>et al.</i> , 2009)                                |
| Inducible<br>Ad-E4-orf6 | 2V6.11              | 1/2                       | lacZ                   | n.k.                                        | yes          | n.k.               | (Murphy <i>et al.</i> , 2009)                                 |
| None                    | HeLa/HuH7           | 1/20                      | luciferase             | $\sim 5 \times 10^6 - 10^8$                 | yes          | yes                | (Boutin <i>et al.</i> , 2010)                                 |
| None                    | HTX                 | 1/20                      | AP                     | $10^6$                                      | no           | yes                | (Halbert <i>et al.</i> , 2006)                                |
| None                    | HEK293              | 1/10                      | lacZ                   | $7 \times 10^9$                             | yes          | no                 | (Ito <i>et al.</i> , 2009)                                    |
| wtAd                    | 293T                | 1/4                       | r.c.a.<br>(rep or cap) | n.k.                                        | no           | no                 | (Katano <i>et al.</i> , 2006;<br>Vardas <i>et al.</i> , 2010) |
| wtAd5                   | 293                 | n.k.                      | r.c.a.<br>(rep or cap) | n.k.                                        | no           | n.k.               | (Moss <i>et al.</i> , 2004)                                   |
| wtAd/X-ray              | B16F10/HeLa         | 1/10                      | GFP                    | $1.25 \times 10^4$                          | yes          | no                 | (Huttner <i>et al.</i> , 2003)                                |
| wtAd                    | HEK293              | 1/20                      | r.c.a.<br>(rep or cap) | n.k.                                        | no           | n.k.               | (Wagner <i>et al.</i> , 2002)                                 |
| Etoposide               | HepG2               | n.k.                      | lacZ                   | $10^6$                                      | yes          | no                 | (Lochrie <i>et al.</i> , 2006)                                |
| None                    | 293                 | 1/1                       | lacZ                   | $8.5 \times 10^7$                           |              | yes                | (Scallan <i>et al.</i> , 2006)                                |
| NaBu/HU                 | HT1080              | 1/20                      | lacZ                   | $2.5 \times 10^6$                           | yes          | yes                | (Zhu <i>et al.</i> , 2009)                                    |

wtAd, wild-type adenovirus type 5; n.k., not known; lacZ,  $\beta$ -galactosidase; r.c.a., replication center assay<sup>18,19</sup>; rep and cap, genes of AAV; DRP, DNase resistant particles.
